# Supplementary material for: Uncovering the Protective Mechanism of the Volatile Oil of Acorus tatarinowii against Acute Myocardial Ischemia Injury Using Network Pharmacology and Experimental Validation
Source: Evid Based Complement Alternat Med. 2021 Jun 22;2021:6630795. doi: 10.1155/2021/6630795 (PMC8241509; doi:10.1155/2021/6630795)
Supplement: Supplementary Materials — Detailed search strategy. [file 6630795.f1.zip]

Archive with 6 entries (6 files):
- 6630795.f1/Supplementary Table S1.docx
- 6630795.f1/Supplementary Table S2.docx
- 6630795.f1/Supplementary Table S3.docx
- 6630795.f1/Supplementary Table S4.docx
- 6630795.f1/Supplementary Table S5.docx
- 6630795.f1/Supplementary Table S6.docx
